# Supplementary material for: Combinational Effect of Cell Adhesion Biomolecules and Their Immobilized Polymer Property to Enhance Cell-Selective Adhesion
Source: Hindawi journal article supplement (doi:10.1155/2016/2090985), 2016-01-01
Supplement: f1 [file 2090985.f1.pdf]

**Supporting information**

**Combinational Effect of Cell Adhesion Biomolecules and Their Immobilized Polymer**

**Property to Enhance Cell-selective Adhesion**

Rio Kurimoto,<sup>1, 2</sup> Kei Kanie,<sup>3</sup> Naokazu Idota,<sup>4</sup> Mitsuo Hara,<sup>5</sup> Shusaku Nagano,<sup>6</sup> Takehiko Tsukahara,<sup>7</sup> Yuji Narita,<sup>8</sup> Hiroyuki Honda,<sup>9</sup> Masanobu Naito,<sup>1, 10</sup> Mitsuhiro Ebara,<sup>2</sup> and Ryuji Kato<sup>3</sup>

<sup>1</sup>*Graduate School of Pure and Applied Sciences, University of Tsukuba, 1-1-1 Tennodai, Tsukuba, Ibaraki 305-8577, Japan*

<sup>2</sup>*Biomaterials Unit, International Center for Materials Nanoarchitectonics (WPI-MANA), National Institute for Materials Science (NIMS), 1-1 Namiki, Tsukuba, Ibaraki 305-0044, Japan*

<sup>3</sup>*Department of Basic Medicinal Sciences, Graduate School of Pharmaceutical Sciences, Nagoya University, Furo-cho, Chikusa-ku, Nagoya, Aichi, 464-8601, Japan*

<sup>4</sup>*Kagami Memorial Research Institute for Materials Science and Technology, Waseda University, 2-8-26 Nishiwaseda, Shinjuku-ku, Tokyo, 169-0051, Japan*

<sup>5</sup>*Department of Molecular Design and Engineering, Graduate School of Engineering, Nagoya University, Furo-cho, Chikusa-ku, Nagoya, Aichi, 464-8603, Japan*

<sup>6</sup>*Nagoya University Venture Business Laboratory, Nagoya University, Furo-cho, Chikusa-ku,*

*Nagoya, Aichi, 464-8603, Japan*

<sup>7</sup>*Research Laboratory for Nuclear Reactors, Tokyo Institute of Technology, 2-12-1, Ookayama,*

*Meguro-ku, Tokyo, 152-8550, Japan*

<sup>8</sup>*Department of Cardiac Surgery, Nagoya University Graduate School of Medicine, 65*

*Turumai-cho, Showa-ku, Nagoya, Aichi, 466-8550, Japan*

<sup>9</sup>*Department of Biotechnology, Graduate School of Engineering, Nagoya University, Furo-cho,*

*Chikusa-ku, Nagoya, Aichi, 464-8603, Japan*

<sup>10</sup>*Structural Materials Unit, Research Center for Strategic Materials, National Institute for*

*Materials Science (NIMS), 1-1 Namiki, Tsukuba, Ibaraki 305-0044, Japan*

Keywords: Cell adhesion; Peptide; Extracellular Matrix (ECM); Smart polymer

Correspondence to: Ryuji Kato (Fax number: +81-52-747-6813, E-mail address: kato-

r@ps.nagoya-u.ac.jp)

Running title: Cell-selective adhesion by biomolecule-polymer combination

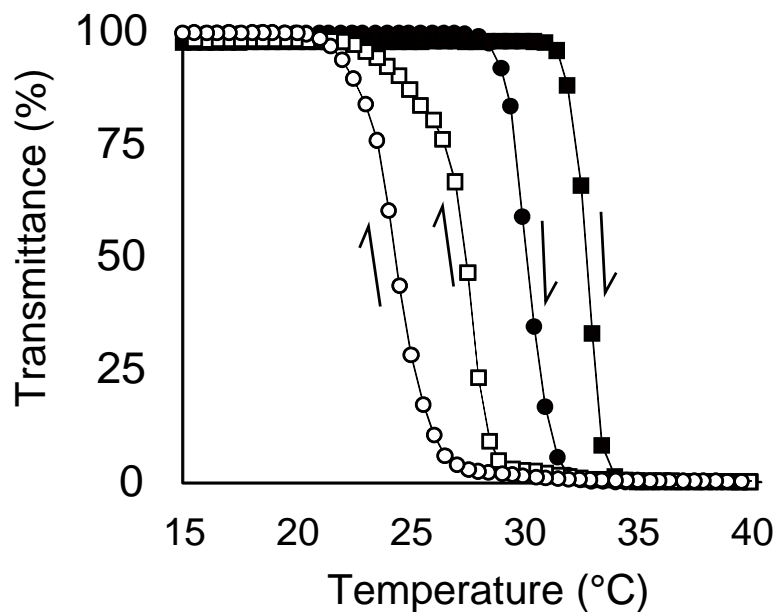

FIGURE S1: Temperature-dependent transmittance changes for free poly(NIPAAm-co-CIPAAm) in a PBS buffer. (open squares) poly(NIPAAm-co-CIPAAm) from 40 °C to 15 °C, (open circles) poly(NIPAAm-co-CIPAAmBz) from 40 °C to 15 °C, (closed squares) poly(NIPAAm-co-CIPAAm) from 15 °C to 40 °C, and (closed circles) poly(NIPAAm-co-CIPAAmBz) from 15 °C to 40 °C.

Lower critical solution temperature (LCST) was measured by the temperature-dependent transmittance changes of the free polymer. Transmittance of the polymer in PBS at 500 nm was continuously monitored at a heating and a cooling rate of 0.5 °C min<sup>-1</sup> using a UV-visible spectrometer (V-550, JASCO International Co, Ltd, Tokyo, Japan).

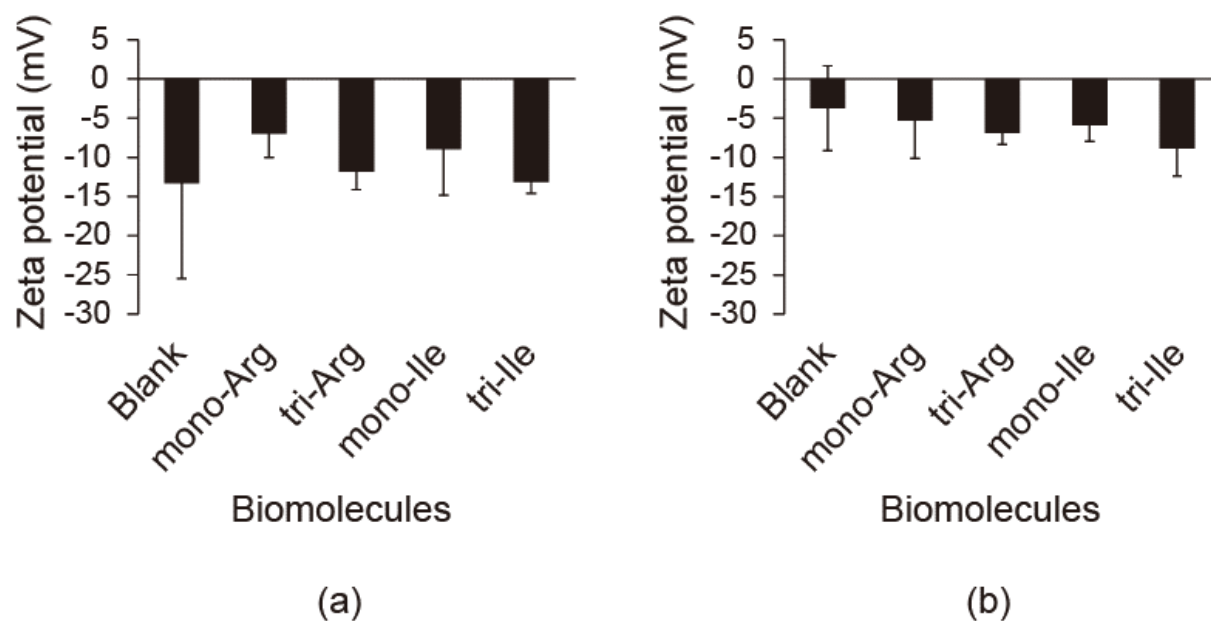

FIGURE S2: Zeta potential analysis of the fabricated substrate surfaces at (a) 37 °C and (b) 20 °C.

The zeta potential of the fabricated polymeric surfaces was measured by a DelsaNano HC Particle Analyzer. Prepared substrates were placed onto a measurement cell in the electrometer. The zeta potentials of the surfaces were measured at 37 °C. The results of the zeta potential are expressed as the mean of three measurements with the standard deviation (SD).

TABLE S1: Adsorption of fibronectin and collagen type IV on the cell assay platform at 37 °C and 20 °C.

| Average intensity ( - ) |      | Blank         | RGDS          | mono-Arg      | tri-Arg       | mono-Ile      | tri-Ile       | Background    |
|-------------------------|------|---------------|---------------|---------------|---------------|---------------|---------------|---------------|
| Fibronectin             | 37°C | 0.086 ± 0.005 | 0.087 ± 0.010 | 0.095 ± 0.002 | 0.098 ± 0.007 | 0.090 ± 0.003 | 0.107 ± 0.006 | 0.086 ± 0.005 |
|                         | 20°C | 0.082 ± 0.005 | 0.082 ± 0.003 | 0.088 ± 0.003 | 0.090 ± 0.006 | 0.088 ± 0.005 | 0.104 ± 0.006 | 0.079 ± 0.004 |
| Collagen type IV        | 37°C | 0.097 ± 0.011 | 0.101 ± 0.003 | 0.110 ± 0.003 | 0.107 ± 0.002 | 0.110 ± 0.003 | 0.111 ± 0.004 | 0.106 ± 0.005 |
|                         | 20°C | 0.080 ± 0.002 | 0.079 ± 0.002 | 0.078 ± 0.005 | 0.079 ± 0.006 | 0.077 ± 0.003 | 0.078 ± 0.004 | 0.076 ± 0.003 |

Adsorption of fibronectin and collagen type IV was measured with fluorescently labeled fibronectin and collagen by Fluoroskan Ascent (type 374; Labsystems, Helsinki, Finland) at 646-nm excitation and 678-nm emission. The fluorescently labeled fibronectin or collagen was dissolved in PBS (67 mg/L). The solution was dropped onto fabricated substrates. Substrates were incubated for 15 min at 37 °C, washed once with PBS at 37 °C, and the fluorescence intensity of the substrates was immediately measured using Fluoroskan Ascent. For the protein adsorption assay in hydrophilic conditions, the substrates were transferred into PBS at 20 °C and incubated for 15 min. Then the fluorescence intensity of the substrates was measured.
